# Supplementary material for: Pregnenolonyl-α-glucoside exhibits marked anti-cancer and CYP17A1 enzymatic inhibitory activities
Source: Royal Society of Chemistry journal article supplement (doi:10.1039/c9cc09415f), 2020-01-01
Supplement: c9cc09415f1.pdf [file c9cc09415f1.pdf]

**Supplementary Information for:**

**Pregnenolonyl- $\alpha$ -Glucoside Exhibits Marked Anti-Cancer and CYP17A1 Enzymatic Inhibitory Activities**

Feng-Pai Chou,<sup>[a],¶</sup> Wen-Chen Hsu,<sup>[a],¶</sup> Sheng-Cih Huang,<sup>[a]</sup> Chin-Yuan Chang,<sup>[a]</sup> Ya-Sheng Chiou,<sup>[a]</sup> Chia-Tse Tsai,<sup>[a]</sup> Jason WenJay Lyu,<sup>[a]</sup> Wei-Ting Chen,<sup>[a]</sup> and Tung-Kung Wu,<sup>\*[a,b]</sup>

<sup>a</sup>Department of Biological Science and Technology, National Chiao Tung University, Hsin-Chu 30010, Taiwan, Republic of China

<sup>b</sup>Center for Emergent Functional Matter Science, National Chiao Tung University, 1001 Ta-Hsueh Rd., Hsinchu 30010, Taiwan, Republic of China

**Scheme S1.** Biosynthesis of steroid hormones from pregnenolone.

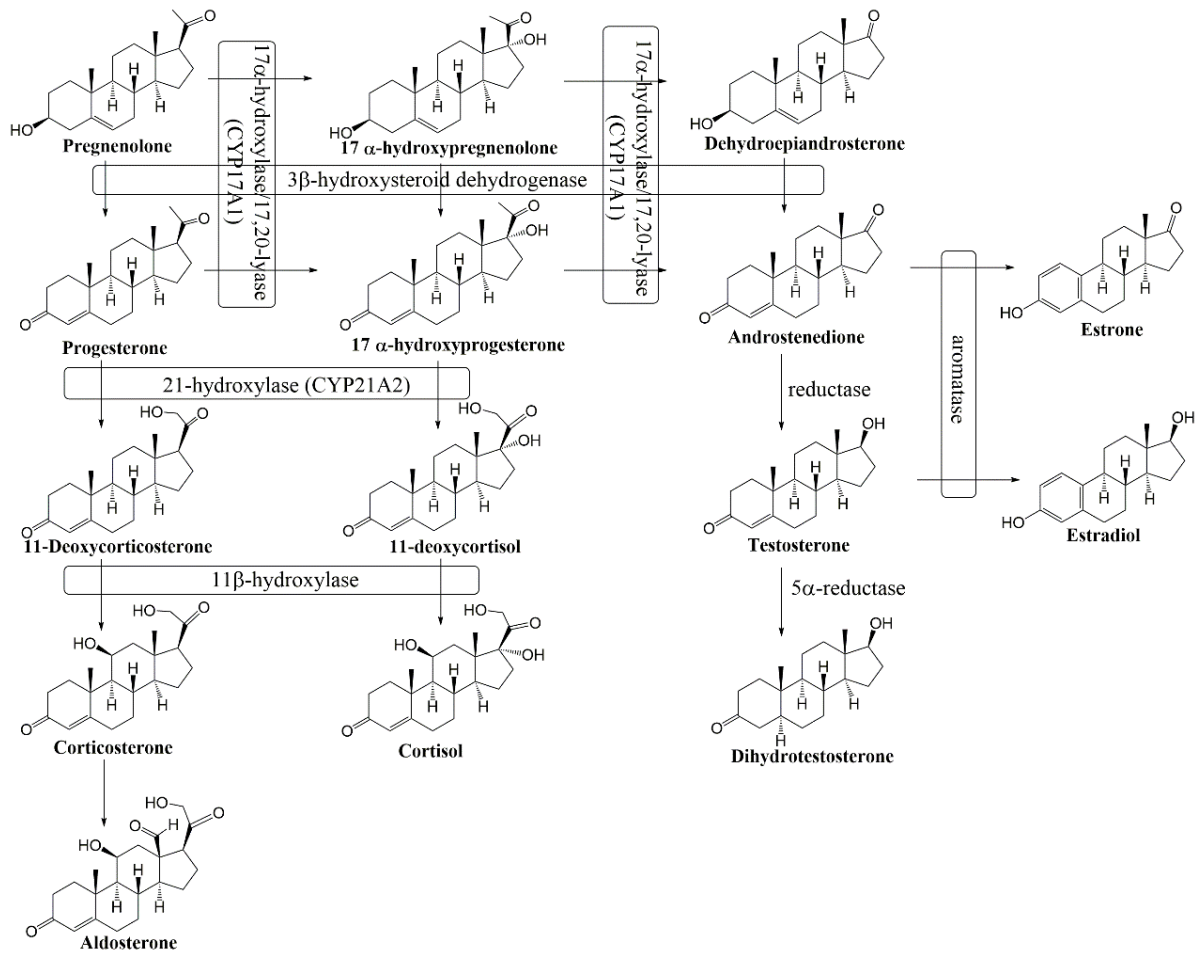

**Fig. S1** High resolution UPLC/ESI-MS of PREG- $\alpha$ -Glc. (A) Theoretical (Mw = 523.2913) and experimental (Mw = 523.2893) data of  $[M + HCOO - H]^-$ . (B) Theoretical (Mw = 477.2858) and experimental (Mw = 477.2838) data of  $[M - H]^-$ .

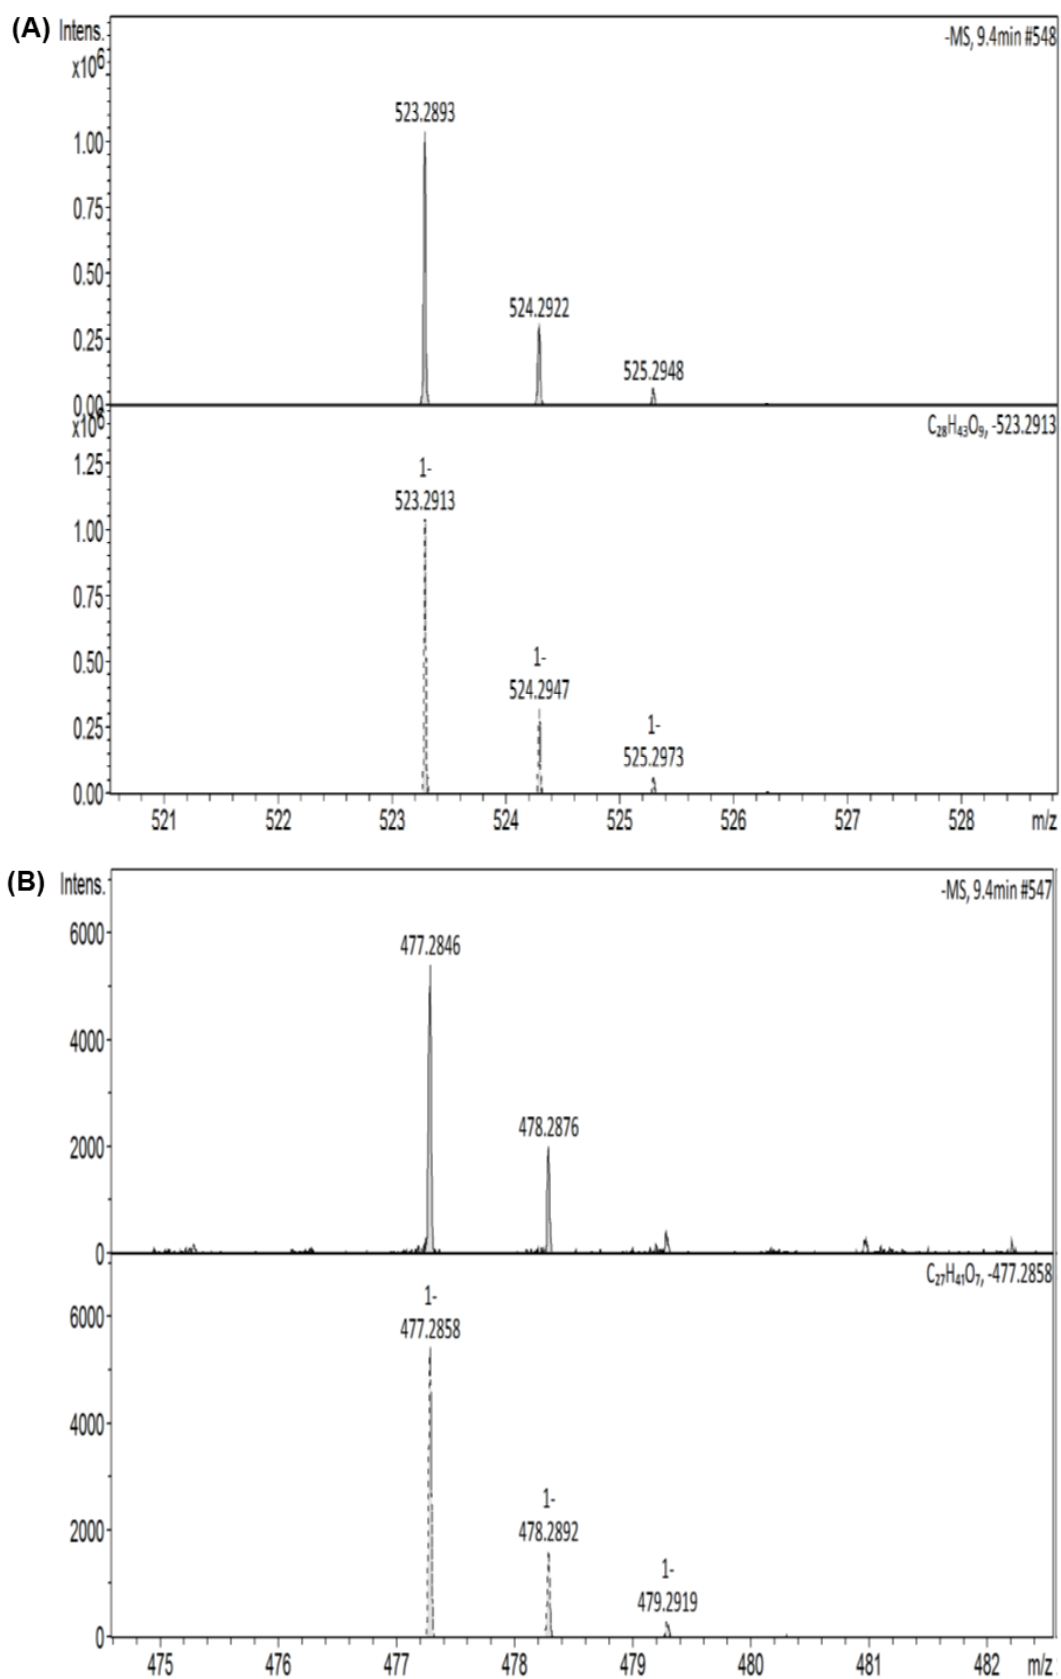

**Fig. S2** High resolution UPLC/ESI-MS of PREG- $\alpha$ -2DG. (A) Theoretical (Mw = 507.2963) and experimental (Mw = 507.2957) data of  $[M + HCOO - H]^-$ . (B) Theoretical (Mw = 461.3093) and experimental (Mw = 461.2902) data of  $[M - H]^-$ .

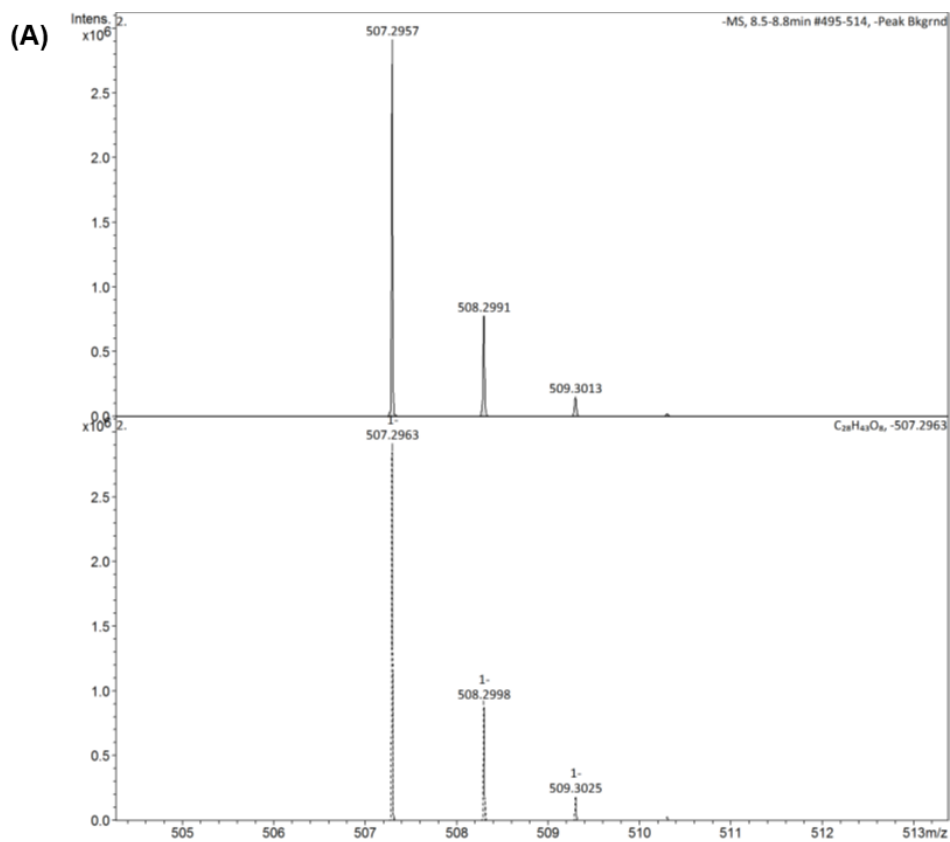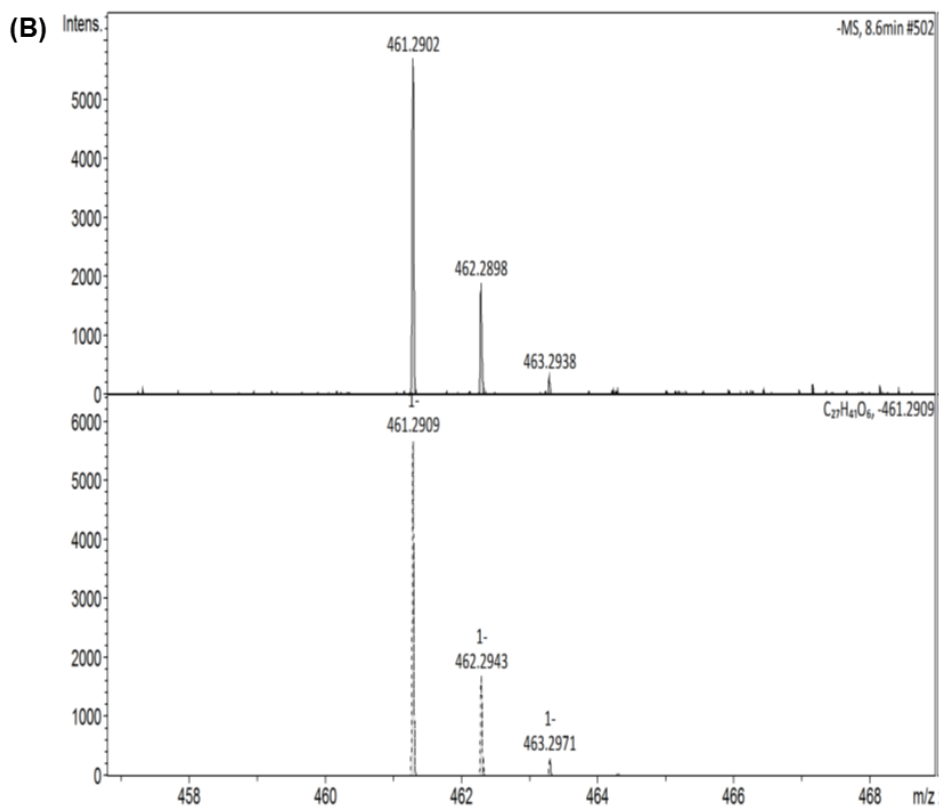

**Fig. S3** High resolution UPLC/ESI-MS of PREG- $\beta$ -Glc. (A) Theoretical (Mw = 523.2913) and experimental (Mw = 523.2928) data of  $[M + HCOO - H]^-$ . (B) Theoretical (Mw = 477.2858) and experimental (Mw = 477.3027) data of  $[M - H]^-$ .

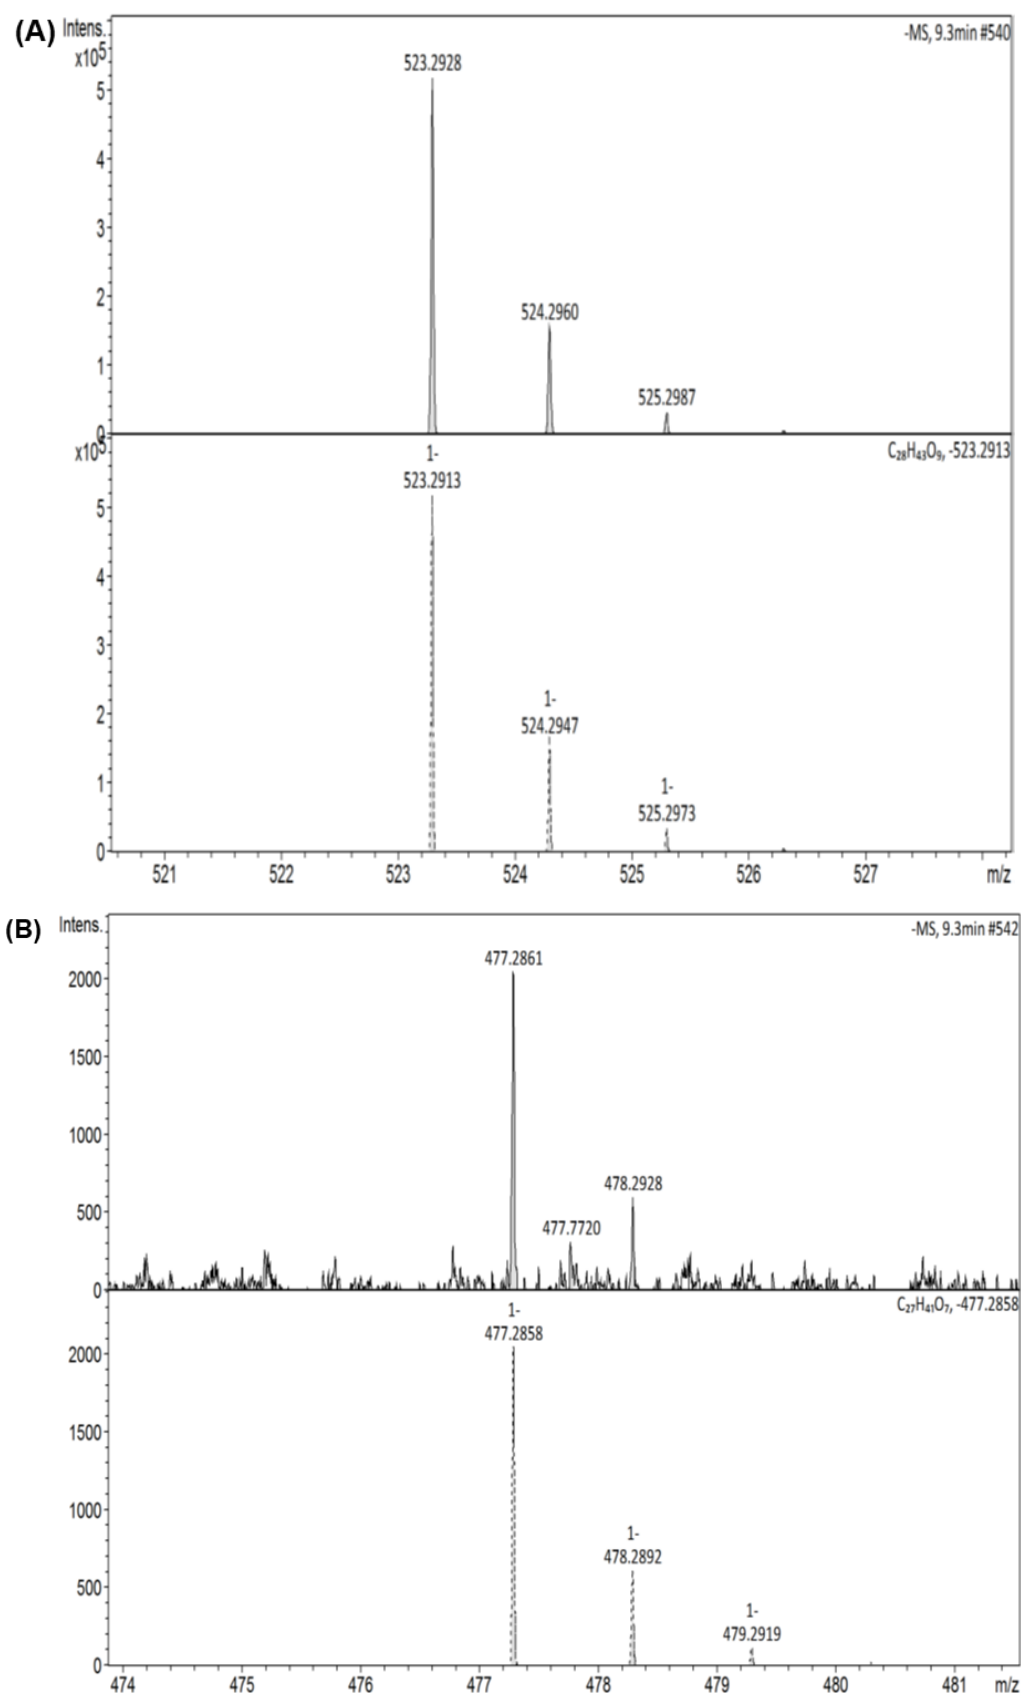

**Fig. S4** NMR of (A)  $^1\text{H}$ -PREG, (B)  $^1\text{H}$ -PREG- $\alpha$ -Glc, and (C)  $^{13}\text{C}$ -PREG- $\alpha$ -Glc.

2 (A)

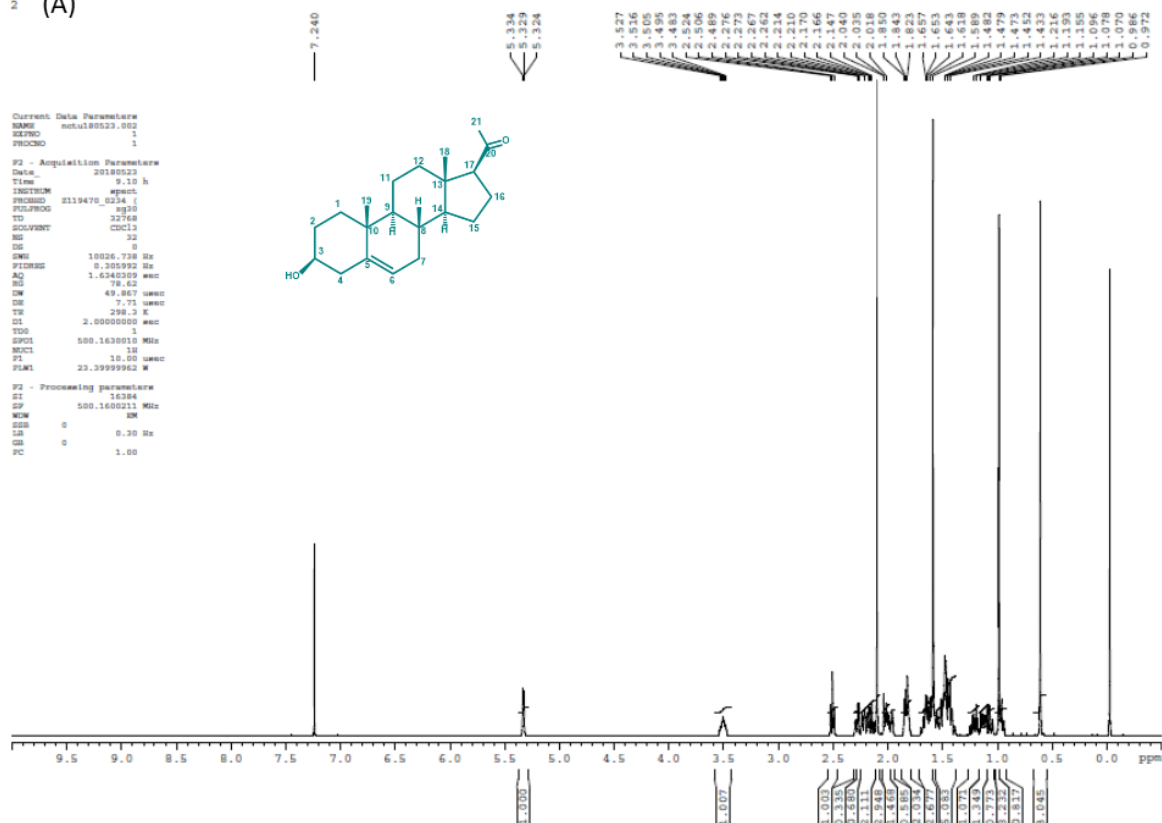

(B)

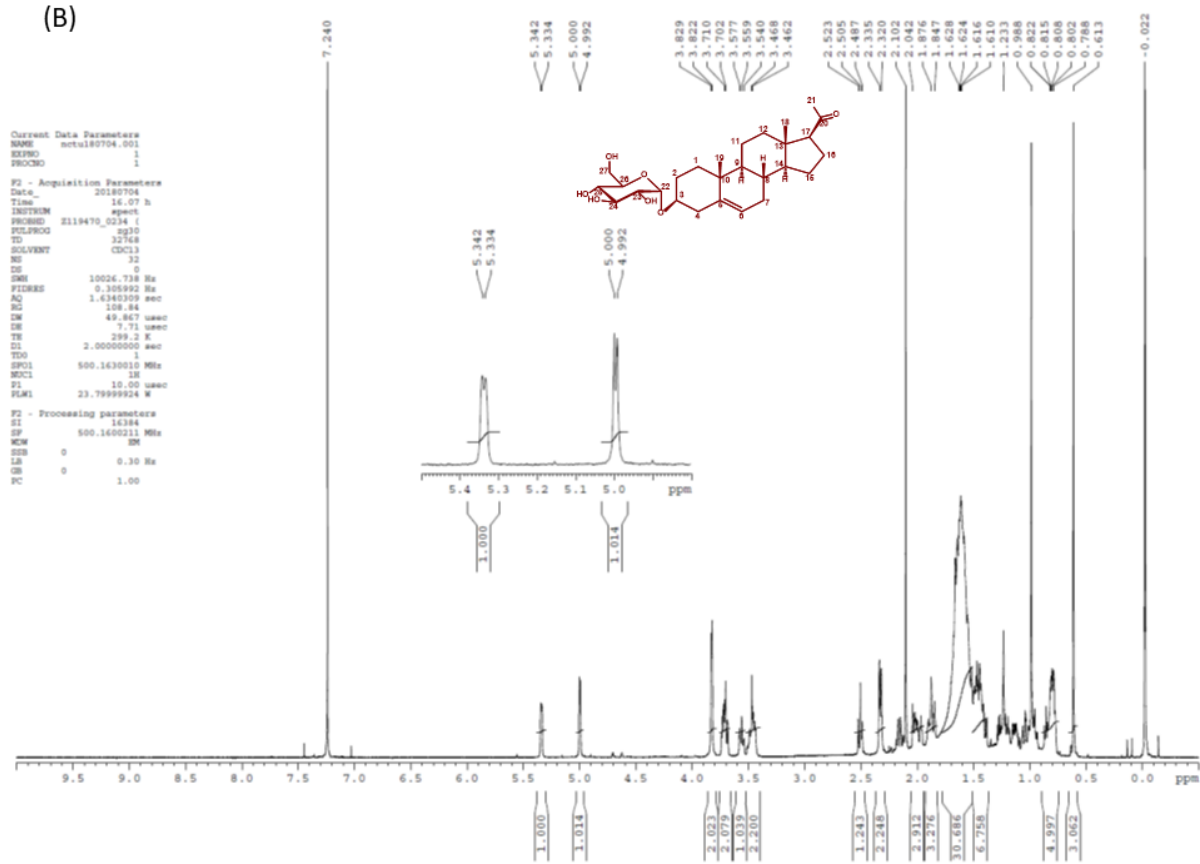

(c)

exp7 CARBON

```
SAMPLE          PRESATURATION
date    Dec 21 2018  satmode      n
solvent  odcl3      wet          n
file    /home/peng/vn-          SPECIAL
mrays/data/Wu-preg-          temp    25.0
-a-glucoside-C.fid          gain    30
ACQUISITION          spin    not used
sw      44642.9      hat      0.008
at      1.468      pw90    14.000
mp      131072     alfa    10.000
fb      17000
be      8          il      n
dl      3.500     in      n
nt      15000     dp      y
ot      15000     hs      nn
TRANSMITTER          PROCESSING
tn      C13       lb      3.00
sfrq    175.970  fn      262144
tof     2679.2   DISPLAY
tpwr    59      ep      -879.8
pw      7.000   wp      39588.7
DECOUPLER          rfl    2960.5
dn      H1      rfp    0
dof     0      rp    13.2
dm      YYY    lp    32.9
decwave  w      PLOT
dpcr    39     wc    200
dmf     10582  sc    0
va      690051
th
ai      ph      2
```

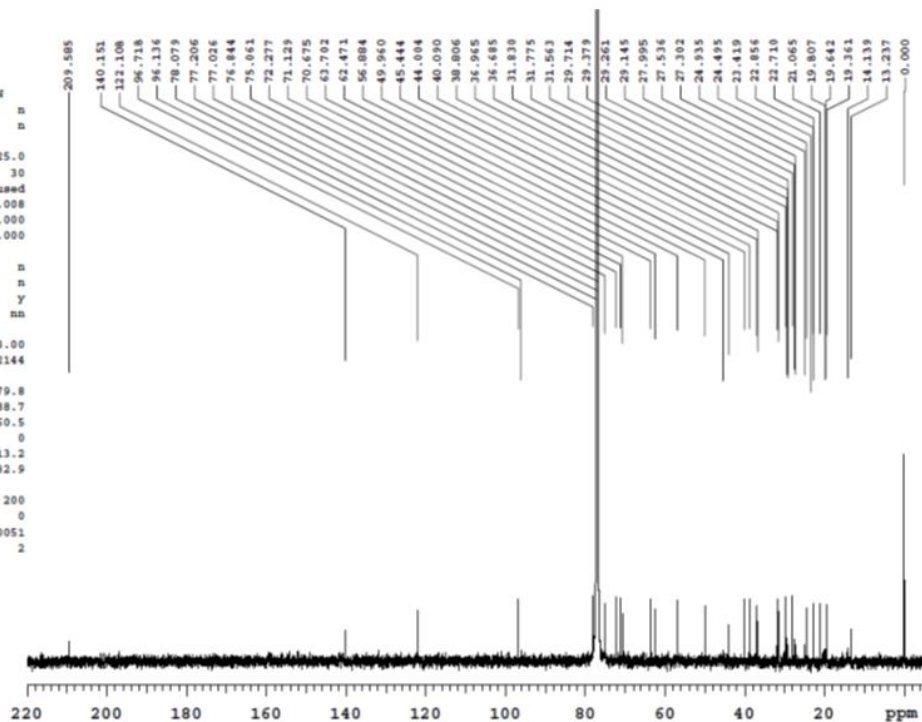

Fig. S5 <sup>1</sup>H and <sup>13</sup>C-NMR of PREG- $\alpha$ -2DG.

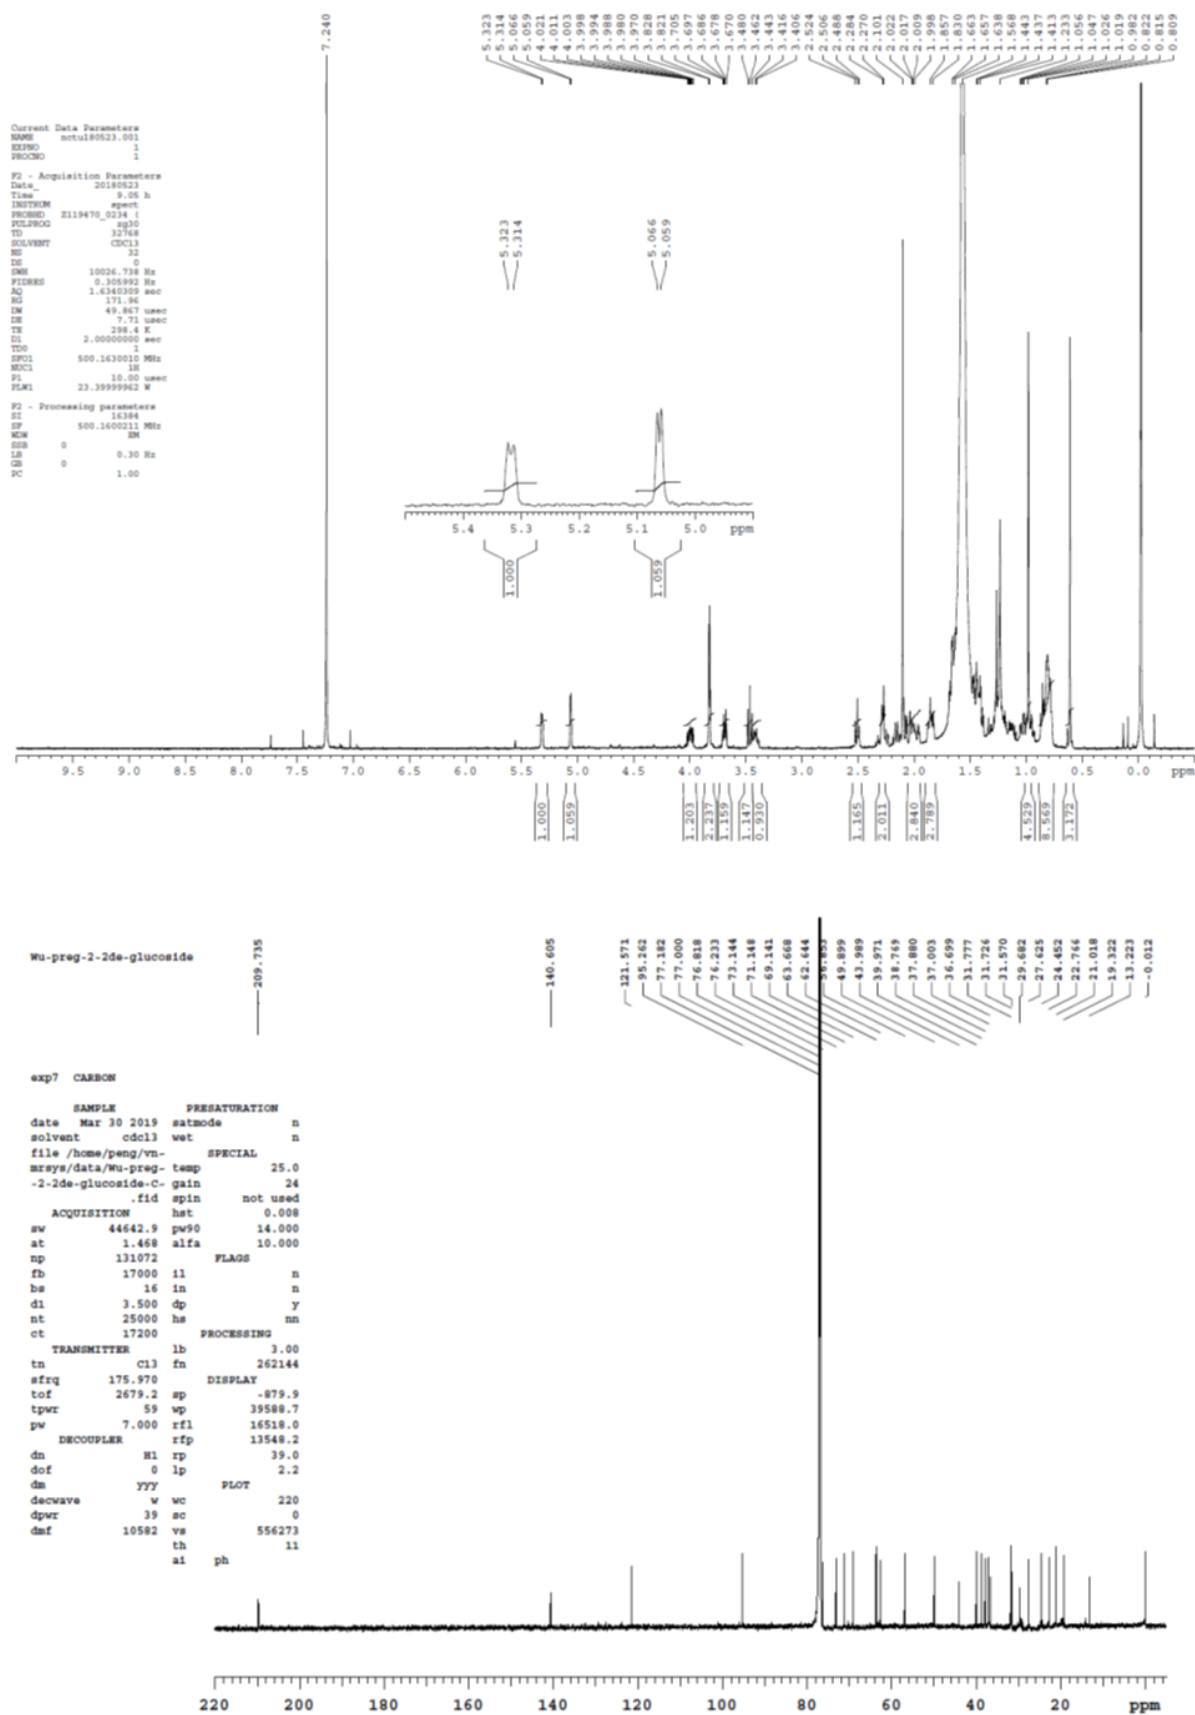





**Fig. S7** Dose-dependent cell viability assay of abiraterone on various cell types. AGS (■), ES-2 (□), HEK293 (●), HT-29 (○), MDA-MB-231 (▲), MCF-7 (△), U87MG (▼), and LNCap (▽).

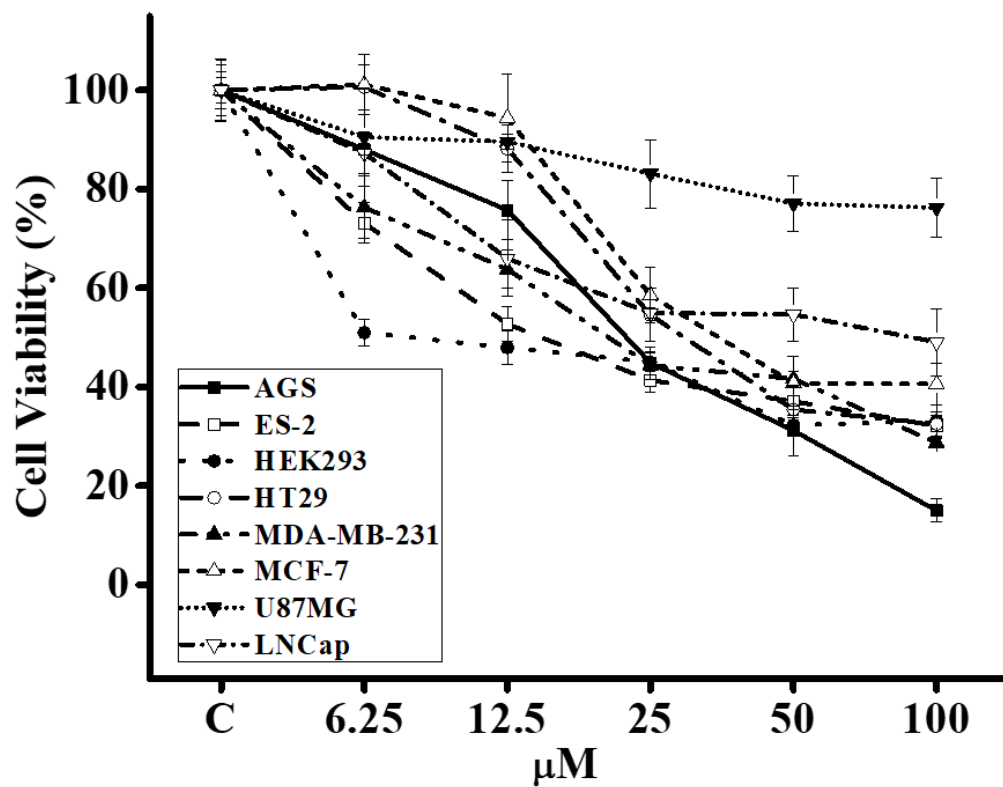

**Fig. S8.** Western blot analysis of CYP17A1 protein expression within HT29 and LNCap cells, respectively.

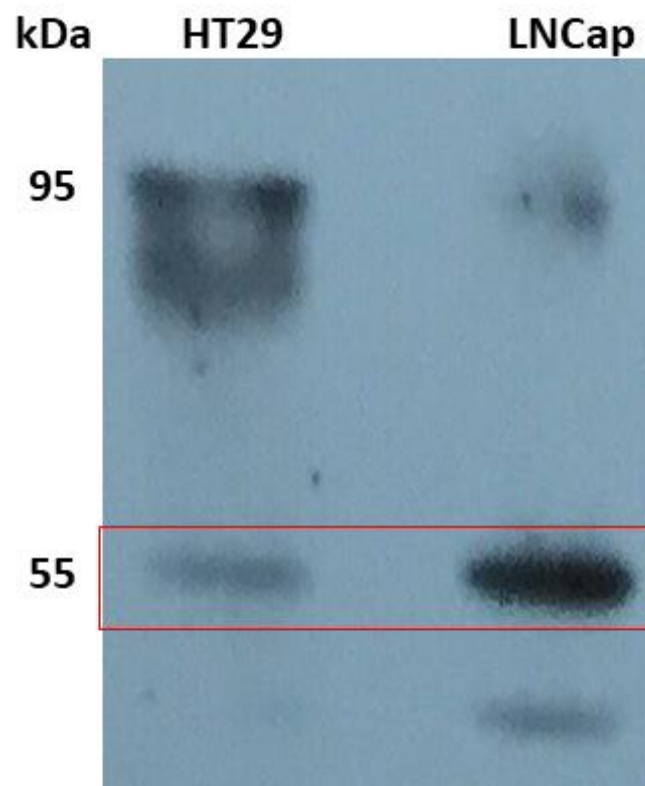

**Table S1.** IC<sub>50</sub> values of cytotoxic activity of PREG (1), PREG- $\alpha$ -Glc (2), PREG- $\alpha$ -2-DG (3), and PREG- $\beta$ -Glc (4) on various cancer cell types.

| Cell Name  | PREG, 1 ( $\mu$ M) | PREG- $\alpha$ -Glu, 2 ( $\mu$ M) | PREG- $\alpha$ -2DG, 3 ( $\mu$ M) | PREG- $\beta$ -Glu, 4 ( $\mu$ M) |
|------------|--------------------|-----------------------------------|-----------------------------------|----------------------------------|
| HEK293     | >200               | >200                              | >200                              | >200                             |
| AGS        | >200               | 36.5 $\pm$ 8.0                    | >200                              | >200                             |
| ES-2       | 179.5 $\pm$ 25.1   | 50.9 $\pm$ 3.0                    | 65.8 $\pm$ 10.7                   | >200                             |
| HT-29      | 91.9 $\pm$ 19.0    | 23.5 $\pm$ 9.9                    | >200                              | >200                             |
| LNCap      | >200               | 115.1 $\pm$ 0.4                   | 149.0 $\pm$ 6.8                   | >200                             |
| MCF-7      | >200               | 90.6 $\pm$ 7.5                    | 52.8 $\pm$ 4.3                    | >200                             |
| MDA-MB-231 | >200               | 54.3 $\pm$ 5.6                    | >200                              | >200                             |
| U87MG      | >200               | 140.2 $\pm$ 9.7                   | 81.9 $\pm$ 5.0                    | >200                             |
